# Supplementary material for: Treatment Costs of Colorectal Cancer by Sex and Age: Population-Based Study on Health Insurance Data from Germany
Source: MDPI journal article supplement (doi:10.3390/cancers14153836), 2022-08-08
Supplement: s1 [file s1]

# Treatment Costs of Colorectal Cancer by Sex and Age: Population-Based Study on Health Insurance Data from Germany

Thomas Heisser, Andreas Simon, Jana Hapfelmeier, Michael Hoffmeister and Hermann Brenner

**Supplementary Table S1.** Definition of costs positions.

| Setting    | Definition                                                                                                                                                                                                                                                                                                                                                                                                                                                                                                                                                                                                                                                                                                                                                                                                                                                                                                                                                                             |
|------------|----------------------------------------------------------------------------------------------------------------------------------------------------------------------------------------------------------------------------------------------------------------------------------------------------------------------------------------------------------------------------------------------------------------------------------------------------------------------------------------------------------------------------------------------------------------------------------------------------------------------------------------------------------------------------------------------------------------------------------------------------------------------------------------------------------------------------------------------------------------------------------------------------------------------------------------------------------------------------------------|
| Inpatient  | All inpatient costs charged for the complete hospital stay when CRC has been coded as primary or secondary diagnosis. Including all cost positions which are not considered CRC-related, e.g. dialysis, but have been conducted during the hospital stay.                                                                                                                                                                                                                                                                                                                                                                                                                                                                                                                                                                                                                                                                                                                              |
| Ambulatory | All outpatient costs charged for the complete outpatient case when CRC has been coded with a secure ICD-10 diagnosis. Including all cost positions which are not considered CRC-related but have been conducted during the time period of the whole outpatient case.                                                                                                                                                                                                                                                                                                                                                                                                                                                                                                                                                                                                                                                                                                                   |
| Medication | <p>In medication setting, package units are multiplied with the price per unit. All ATC-codes from the following groups:</p> <ul style="list-style-type: none"> <li>- Chemotherapies and cytostatic antibiotics: 'L01BC06', 'L01BC02', 'L01BC59', 'L01XA03', 'L01XX19', 'V03AF03', 'L01DC03'</li> <li>- Innovative medicines (targeted therapies and monoclonal antibodies) 'L01XE21', 'L01XE15', 'L01XE07', 'L01XX44', 'S01LA05'; 'L01XC07', 'L01XC06', 'L01XC08', 'L01XC21', 'L01XC17', 'L01XC11', 'L01XC18', 'L01XC03'</li> <li>- Other medication, possible CRC-related, defined as the remainder excluding the following ATC codes: 'D', 'G', 'H', 'P', 'R', 'S', 'M', 'A01', 'A02', 'A08', 'A10', 'A13', 'A14', 'B01', 'B02', 'B03', 'B04', 'B05', 'B06', 'C01', 'C02', 'C03', 'C04', 'C05', 'C06', 'C07', 'C08', 'C09', 'J04', 'J05', 'L03', 'L04', 'N03', 'N04', 'N07', 'V01', 'V03', 'V60', 'N05A', 'N06B', 'N06C', 'N06D', 'V09A', 'V09E', 'V09F', 'V09G', 'V09H'</li> </ul> |

**Supplementary Table S2.** Colorectal cancer cost distributions in colorectal cancer patients after diagnosis, stratified by sex and age.

| Year after<br>Diagnosis | No of<br>Patients | Average<br>Costs | 25%<br>Quantile | Median<br>Costs | 75%<br>Quantile | No of<br>Patients | Average<br>Costs | 25%<br>Quantile | Median<br>Costs | 75%<br>Quantile |
|-------------------------|-------------------|------------------|-----------------|-----------------|-----------------|-------------------|------------------|-----------------|-----------------|-----------------|
| Men                     |                   |                  |                 |                 |                 | women             |                  |                 |                 |                 |
| <70 age                 |                   |                  |                 |                 |                 | <70 age           |                  |                 |                 |                 |
| 1                       | 486               | 16,450           | 409             | 11,409          | 23,974          | 411               | 10,071           | 279             | 2529            | 15,829          |
| 2                       | 336               | 3147             | 67              | 476             | 1081            | 283               | 1900             | 17              | 204             | 611             |
| 3                       | 119               | 1809             | 88              | 363             | 797             | 91                | 2226             | 53              | 257             | 596             |
| 4                       | 79                | 1203             | 34              | 198             | 439             | 55                | 765              | 14              | 89              | 364             |
| ≥70 age                 |                   |                  |                 |                 |                 | ≥70 age           |                  |                 |                 |                 |
| 1                       | 360               | 16,375           | 7501            | 11,896          | 23,143          | 491               | 13,250           | 4549            | 11,230          | 18,015          |
| 2                       | 285               | 1998             | 202             | 478             | 945             | 371               | 2009             | 201             | 498             | 961             |
| 3                       | 120               | 1920             | 101             | 511             | 865             | 173               | 2122             | 182             | 437             | 899             |
| 4                       | 94                | 1195             | 57              | 201             | 474             | 131               | 841              | 97              | 294             | 574             |

**Supplementary Table S3.** Colorectal cancer cost distributions in colorectal cancer patients prior to death, stratified by sex and age.

| Year after<br>Diagnosis | No of<br>Patients | Average<br>Costs | 25%<br>Quantile | Median<br>Costs | 75%<br>Quantile | No of<br>Patients | Average<br>Costs | 25%<br>Quantile | Median<br>Costs | 75%<br>Quantile |
|-------------------------|-------------------|------------------|-----------------|-----------------|-----------------|-------------------|------------------|-----------------|-----------------|-----------------|
| Men                     |                   |                  |                 |                 |                 | women             |                  |                 |                 |                 |
| <70 age                 |                   |                  |                 |                 |                 | <70 age           |                  |                 |                 |                 |
| 1                       | 165               | 34,351           | 7250            | 33,855          | 53,729          | 90                | 31,417           | 13,745          | 31,546          | 48,288          |
| 2                       | 117               | 30,609           | 6615            | 25,369          | 46,902          | 56                | 23,041           | 1954            | 19,942          | 36,977          |
| 3                       | 70                | 20,193           | 444             | 14,348          | 29,978          | 25                | 23,151           | 869             | 17,858          | 45,349          |
| 4                       | 64                | 12,892           | 262             | 3346            | 16,976          | 23                | 10,759           | 300             | 2382            | 16,706          |
| 5                       | 35                | 6696             | 131             | 598             | 8704            | 15                | 5835             | 82              | 1382            | 6979            |
| ≥70 age                 |                   |                  |                 |                 |                 | ≥70 age           |                  |                 |                 |                 |
| 1                       | 393               | 14,463           | 565             | 2754            | 21,907          | 469               | 9930             | 677             | 2533            | 11,254          |
| 2                       | 303               | 10,109           | 325             | 885             | 12,210          | 345               | 7180             | 337             | 1100            | 8244            |
| 3                       | 191               | 4907             | 215             | 543             | 2324            | 215               | 3692             | 186             | 553             | 2358            |
| 4                       | 176               | 5874             | 100             | 526             | 5180            | 199               | 3148             | 156             | 447             | 1719            |
| 5                       | 108               | 3070             | 43              | 247             | 1066            | 121               | 2038             | 109             | 307             | 953             |

**Supplementary Table S4.** Total inpatient, outpatient and medication costs in colorectal cancer patients 1–5 years after diagnosis, stratified by sex and age (Total healthcare costs).

| Year after<br>Diagnosis | No of<br>Patients | Median Age<br>(years) | Hospital | Average Costs in EUR |            |        |
|-------------------------|-------------------|-----------------------|----------|----------------------|------------|--------|
|                         |                   |                       |          | Ambulatory           | Medication | Total  |
| Men                     |                   |                       |          |                      |            |        |
| <70 age                 |                   |                       |          |                      |            |        |
| 1                       | 486               | 59                    | 15,025   | 1733                 | 3487       | 20,245 |
| 2                       | 336               | 60                    | 3865     | 850                  | 1720       | 6435   |
| 3                       | 119               | 61                    | 1906     | 779                  | 1194       | 3879   |
| 4                       | 79                | 62                    | 707      | 526                  | 1141       | 2374   |
| ≥70 age                 |                   |                       |          |                      |            |        |
| 1                       | 360               | 75                    | 16,540   | 1818                 | 2852       | 21,210 |
| 2                       | 285               | 76                    | 3458     | 1050                 | 1732       | 6240   |
| 3                       | 120               | 77                    | 3278     | 1088                 | 1466       | 5832   |
| 4                       | 94                | 78                    | 1502     | 712                  | 1236       | 3450   |
| Women                   |                   |                       |          |                      |            |        |
| <70 age                 |                   |                       |          |                      |            |        |
| 1                       | 411               | 58                    | 9172     | 1267                 | 2670       | 13,109 |
| 2                       | 283               | 59                    | 1608     | 838                  | 1493       | 3938   |
| 3                       | 91                | 59                    | 2041     | 946                  | 1843       | 4831   |
| 4                       | 55                | 62                    | 1145     | 559                  | 507        | 2211   |
| ≥70 age                 |                   |                       |          |                      |            |        |
| 1                       | 491               | 78                    | 14,087   | 1519                 | 2122       | 17,728 |
| 2                       | 371               | 78                    | 3557     | 1098                 | 1737       | 6392   |
| 3                       | 173               | 78                    | 2387     | 1123                 | 1967       | 5477   |
| 4                       | 131               | 79                    | 1058     | 635                  | 881        | 2574   |

Costs as actually incurring in the period 2012–2016.

**Supplementary Table S5.** Total inpatient, outpatient and medication costs in colorectal cancer patients 1–5 years prior to death, stratified by sex and age (Total healthcare costs).

| Year before<br>Death | No of<br>Patients | Median Age<br>(years) | Average Costs in EUR |            |            | Total  |
|----------------------|-------------------|-----------------------|----------------------|------------|------------|--------|
|                      |                   |                       | Hospital             | Ambulatory | Medication |        |
| Men                  |                   |                       |                      |            |            |        |
| <70 age              |                   |                       |                      |            |            |        |
| 5                    | 35                | 62                    | 8441                 | 358        | 3466       | 12,265 |
| 4                    | 64                | 61                    | 8482                 | 906        | 7178       | 16,566 |
| 3                    | 70                | 61                    | 8470                 | 1491       | 16,843     | 26,804 |
| 2                    | 117               | 60                    | 15,930               | 2203       | 19,962     | 38,094 |
| 1                    | 165               | 60                    | 23,189               | 2309       | 19,963     | 45,460 |
| ≥70 age              |                   |                       |                      |            |            |        |
| 5                    | 108               | 81                    | 4826                 | 319        | 1507       | 6652   |
| 4                    | 176               | 80                    | 7616                 | 495        | 2064       | 10,174 |
| 3                    | 191               | 81                    | 6068                 | 827        | 3668       | 10,563 |
| 2                    | 303               | 81                    | 8200                 | 1238       | 6024       | 15,462 |
| 1                    | 393               | 81                    | 16,854               | 1601       | 6932       | 25,387 |
| Women                |                   |                       |                      |            |            |        |
| <70 age              |                   |                       |                      |            |            |        |
| 5                    | 15                | 64                    | 3886                 | 729        | 4458       | 9073   |
| 4                    | 23                | 62                    | 9034                 | 696        | 5310       | 15,040 |
| 3                    | 25                | 63                    | 10,221               | 1208       | 14,997     | 26,426 |
| 2                    | 56                | 62                    | 11,820               | 1886       | 16,462     | 30,168 |
| 1                    | 90                | 60                    | 25,100               | 2210       | 18,002     | 45,312 |
| ≥70 age              |                   |                       |                      |            |            |        |
| 5                    | 121               | 82                    | 3102                 | 290        | 1472       | 4864   |
| 4                    | 199               | 83                    | 4412                 | 490        | 1594       | 6496   |
| 3                    | 215               | 84                    | 4471                 | 685        | 2424       | 7579   |
| 2                    | 345               | 84                    | 6648                 | 1141       | 4030       | 11,819 |
| 1                    | 469               | 84                    | 13,458               | 1443       | 4358       | 19,259 |

Costs as actually incurring in the period 2012–2016.

**Supplementary Table S6.** Total inpatient, outpatient and medication costs in colorectal cancer patients prior to death, stratified by sex and age, excluding individuals with poor prognosis (diagnosed and died within 2012–2016).

| Year before<br>Death | No of<br>Patients | Median Age<br>(years) | Average CRC-related Costs in EUR |            |            |        | Average Total<br>Healthcare<br>Costs in EUR |
|----------------------|-------------------|-----------------------|----------------------------------|------------|------------|--------|---------------------------------------------|
|                      |                   |                       | Hospital                         | Ambulatory | Medication | Total  |                                             |
| Men                  |                   |                       |                                  |            |            |        |                                             |
| <70 age              |                   |                       |                                  |            |            |        |                                             |
| 5                    | 35                | 62                    | 4007                             | 152        | 2538       | 6696   | 12,265                                      |
| 4                    | 55                | 62                    | 5198                             | 388        | 5195       | 10,781 | 14,860                                      |
| 3                    | 58                | 63                    | 4701                             | 834        | 11,272     | 16,807 | 23,551                                      |
| 2                    | 66                | 63                    | 8748                             | 1453       | 18,571     | 28,772 | 36,028                                      |
| 1                    | 83                | 62                    | 12,140                           | 1470       | 17,284     | 30,894 | 44,302                                      |
| ≥70 age              |                   |                       |                                  |            |            |        |                                             |
| 5                    | 108               | 81                    | 2182                             | 109        | 779        | 3070   | 6652                                        |
| 4                    | 166               | 81                    | 4001                             | 224        | 1334       | 5560   | 9959                                        |
| 3                    | 177               | 81                    | 1317                             | 398        | 2449       | 4164   | 9603                                        |
| 2                    | 230               | 81                    | 2400                             | 587        | 4010       | 6997   | 12,590                                      |
| 1                    | 252               | 82                    | 4107                             | 886        | 4456       | 9449   | 21,505                                      |
| Women                |                   |                       |                                  |            |            |        |                                             |
| <70 age              |                   |                       |                                  |            |            |        |                                             |
| 5                    | 15                | 65                    | 2668                             | 187        | 2980       | 5835   | 9073                                        |
| 4                    | 22                | 64                    | 5878                             | 455        | 4513       | 10,846 | 15,292                                      |
| 3                    | 22                | 66                    | 9043                             | 827        | 11,842     | 21,712 | 25,090                                      |
| 2                    | 37                | 64                    | 6162                             | 990        | 13,557     | 20,710 | 28,603                                      |
| 1                    | 44                | 64                    | 7631                             | 1698       | 16,374     | 25,703 | 43,478                                      |
| ≥70 age              |                   |                       |                                  |            |            |        |                                             |
| 5                    | 121               | 82                    | 1514                             | 109        | 415        | 2038   | 4864                                        |
| 4                    | 188               | 83                    | 2018                             | 215        | 781        | 3014   | 6410                                        |
| 3                    | 201               | 84                    | 1646                             | 334        | 1529       | 3508   | 7490                                        |
| 2                    | 257               | 85                    | 2038                             | 533        | 2464       | 5034   | 9569                                        |
| 1                    | 293               | 85                    | 3928                             | 722        | 2374       | 7024   | 16,544                                      |

Costs as actually incurring in the period 2012–2016.

**Supplementary Table S7.** Total inpatient, outpatient and medication costs in colorectal cancer patients prior to death, stratified by sex and age, only individuals with poor prognosis (diagnosed and died within 2012–2016) \*.

| Year before<br>Death | No of<br>Patients | Median Age<br>(years) | Average CRC-related Costs in EUR |            |            |       | Average Total<br>Healthcare<br>Costs in EUR |
|----------------------|-------------------|-----------------------|----------------------------------|------------|------------|-------|---------------------------------------------|
|                      |                   |                       | Hospital                         | Ambulatory | Medication | Total |                                             |
| Men                  |                   |                       |                                  |            |            |       |                                             |
| <70 age              |                   |                       |                                  |            |            |       |                                             |
| 4                    | 5                 | 63                    | 10396                            | 1739       | 15472      | 27607 | 30724                                       |
| 3                    | 6                 | 61                    | 2992                             | 3429       | 26797      | 33218 | 41054                                       |
| 2                    | 28                | 61                    | 19939                            | 1992       | 10751      | 32682 | 41071                                       |
| 1                    | 42                | 61                    | 16635                            | 2036       | 14042      | 32713 | 42230                                       |
| ≥70 age              |                   |                       |                                  |            |            |       |                                             |
| 4                    | 4                 | 80                    | 7842                             | 997        | 2141       | 10981 | 13405                                       |
| 3                    | 7                 | 75                    | 14439                            | 1532       | 9723       | 25694 | 36614                                       |
| 2                    | 45                | 78                    | 13319                            | 1540       | 6187       | 21045 | 26925                                       |
| 1                    | 87                | 79                    | 16508                            | 1492       | 7350       | 25349 | 33609                                       |
| Women                |                   |                       |                                  |            |            |       |                                             |
| <70 age              |                   |                       |                                  |            |            |       |                                             |
| 2                    | 11                | 60                    | 9379                             | 2308       | 17996      | 29683 | 35972                                       |
| 1                    | 23                | 61                    | 22119                            | 1871       | 15559      | 39549 | 49506                                       |
| ≥70 age              |                   |                       |                                  |            |            |       |                                             |
| 4                    | 7                 | 82                    | 4915                             | 182        | 439        | 5536  | 7548                                        |
| 3                    | 10                | 85                    | 7208                             | 835        | 673        | 8715  | 11177                                       |
| 2                    | 59                | 83                    | 8191                             | 1143       | 5601       | 14935 | 19319                                       |
| 1                    | 123               | 83                    | 9626                             | 1298       | 3939       | 14863 | 22235                                       |

\* no data available for women <70 years 3–4 years prior to death

Costs as actually incurring in the period 2012–2016.

### A. Initial phase of care study population

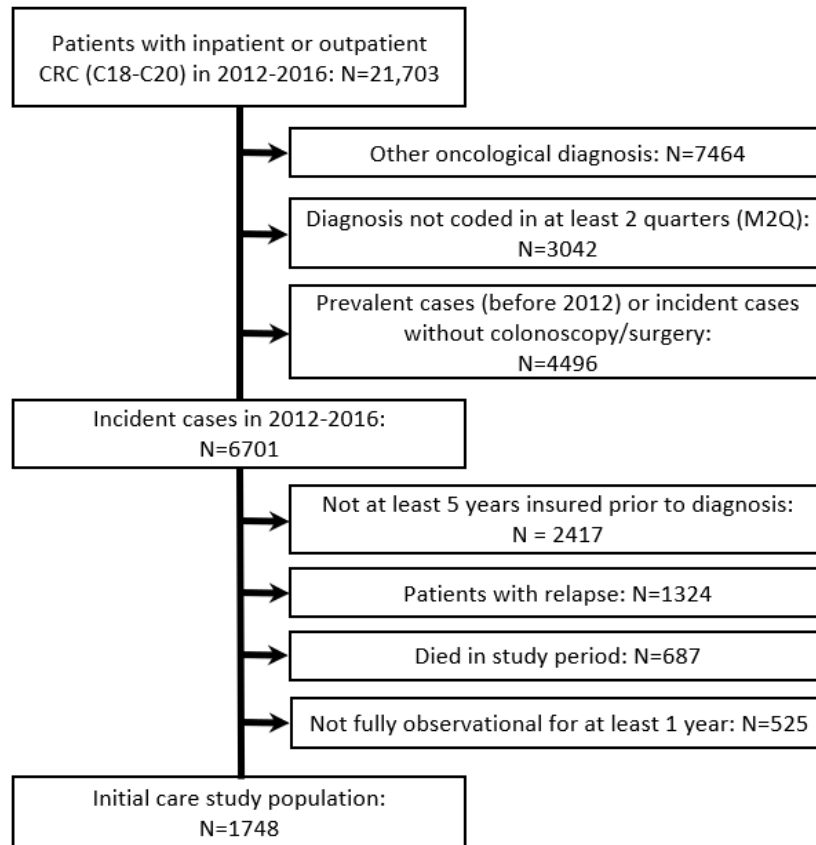

### B. End-of-life care study population

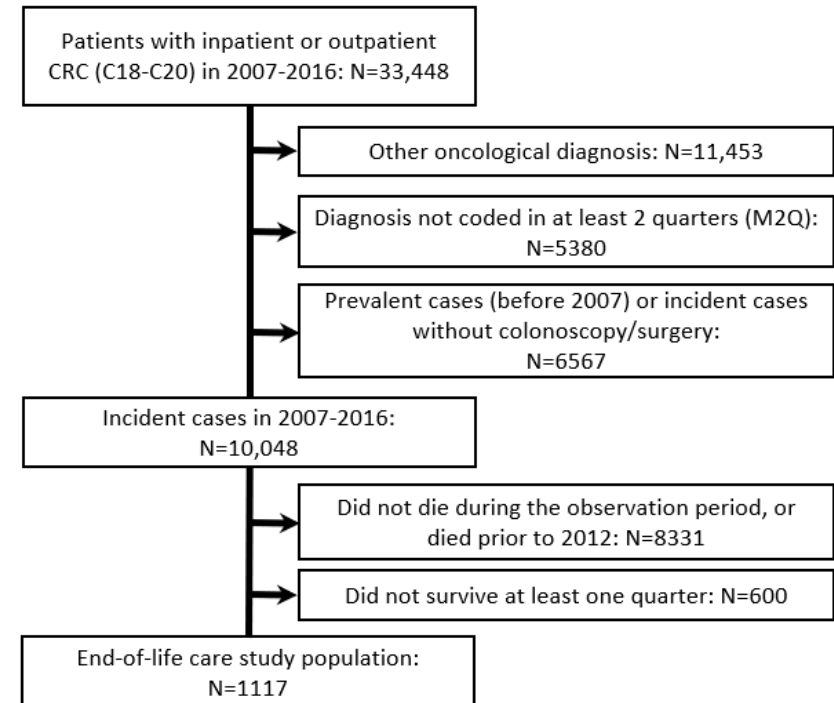

CRC, colorectal cancer

**Supplementary Figure S1.** Patient flowcharts.

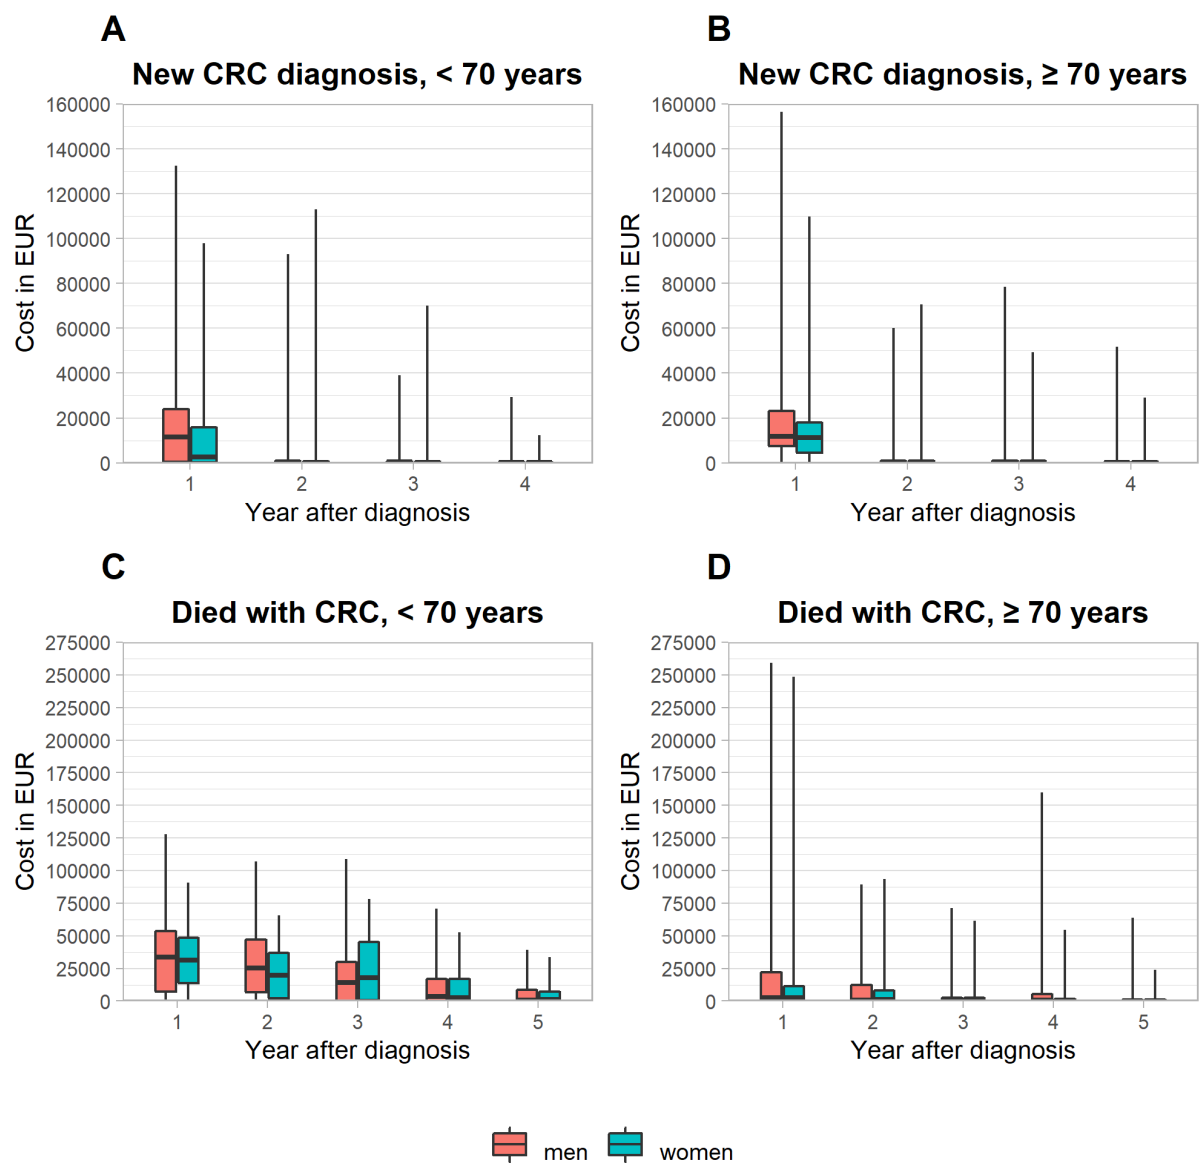

CRC, colorectal cancer

**Supplementary Figure S2.** Boxplots of total colorectal cancer cost distributions.

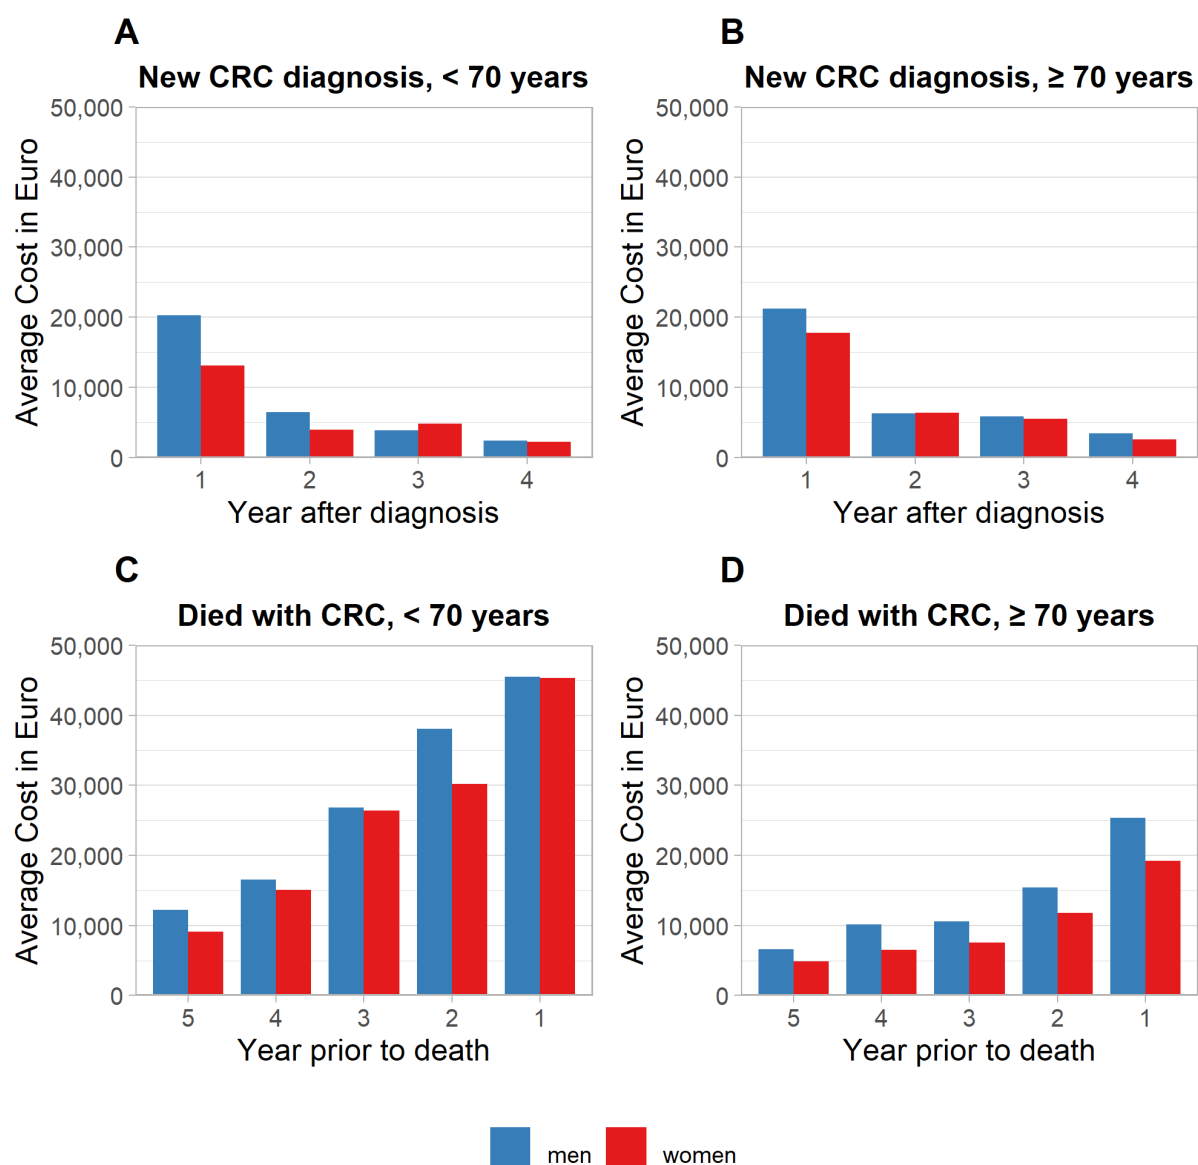

CRC, colorectal cancer

**Supplementary Figure S3.** Average total healthcare costs in colorectal cancer patients after new diagnosis and prior to death, stratified by sex and age. A+B, newly diagnosed cases. C+D, subjects who died with CRC.



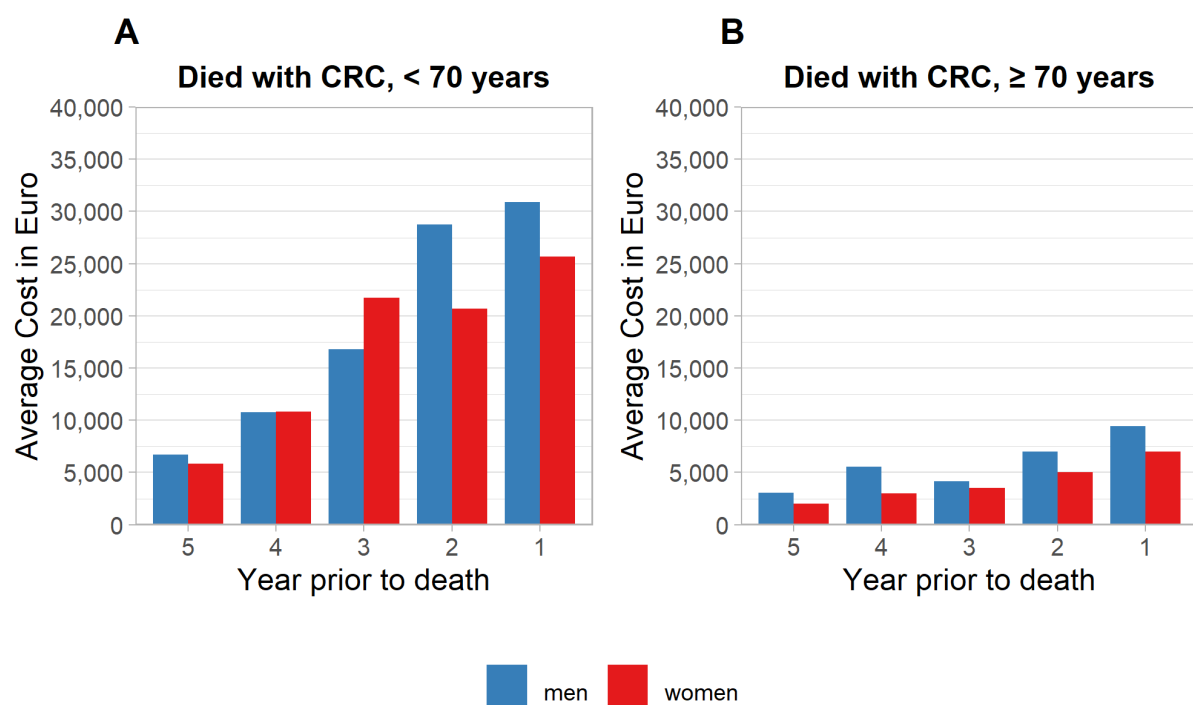

CRC, colorectal cancer

**Supplementary Figure S4.** Total average treatment costs of colorectal cancer prior to death, stratified by sex and age, excluding individuals with poor prognosis (diagnosed and died within 2012–2016).

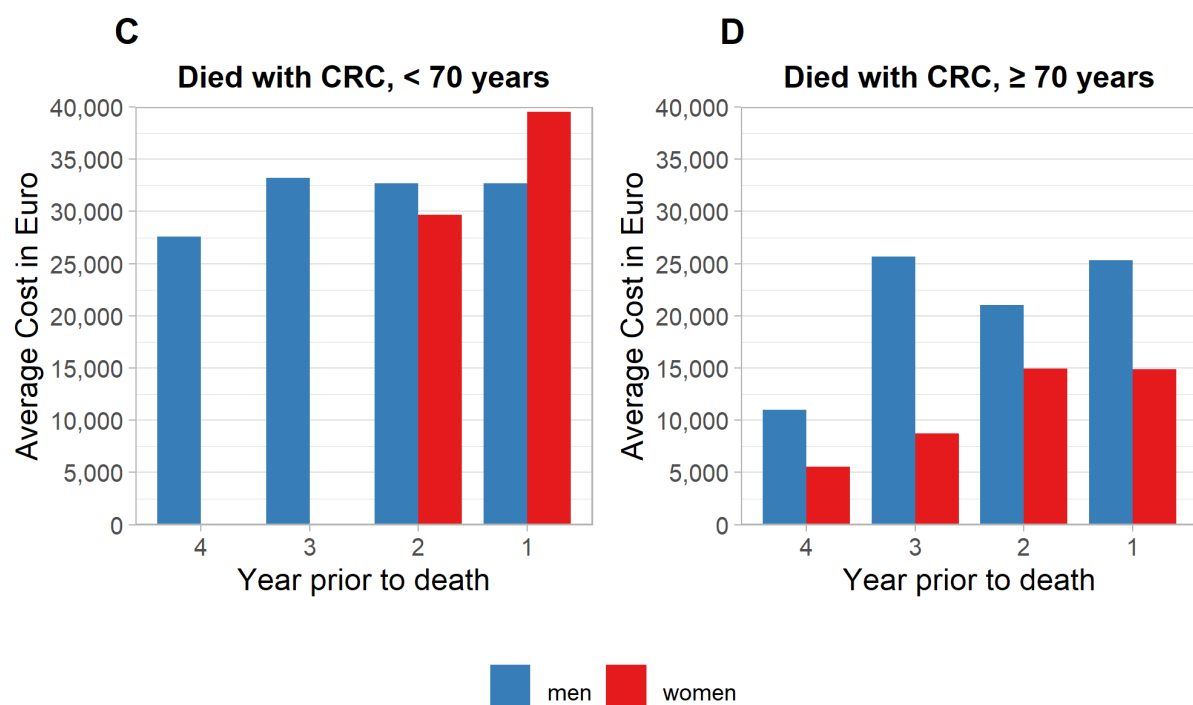

CRC, colorectal cancer

\* no data available for women <70 years 3–4 years prior to death

**Supplementary Figure S5.** Total average treatment costs of colorectal cancer prior to death, stratified by sex and age, only individuals with poor prognosis (diagnosed and died within 2012–2016) \*.
